# Supplementary material for: Mental Health in Australia: Psychological Distress Reported in Six Consecutive Cross-Sectional National Surveys From 2001 to 2018
Source: PubMed Central journal article supplement (PMC9010616; doi:10.3389/fpsyt.2022.815904), 2022-04-01
Supplement: Data_Sheet_1.pdf [file Data_Sheet_1.pdf]

## Supplementary Tables

Supplementary Table 1: Odds Ratio of psychological distress adjusted for year, sex, age and residential location.

|                    |                | K10 very-high |               |            |            | K10 combined high/very-high |               |            |            |
|--------------------|----------------|---------------|---------------|------------|------------|-----------------------------|---------------|------------|------------|
|                    |                | Odds Ratio    | p-value       | [95% Conf. | Interv al] | Odds Ratio                  | p-value       | [95% Conf. | Interv al] |
| <b>Year</b>        | 2001           | (Ref)         | -             | -          | -          | (Ref)                       | -             | -          | -          |
|                    | 2004           | 1.03          | 0.602         | 0.92       | 1.15       | 1.01                        | 0.705         | 0.95       | 1.08       |
|                    | 2007           | 0.92          | 0.168         | 0.81       | 1.04       | 0.92                        | 0.017*        | 0.86       | 0.98       |
|                    | 2011           | 0.95          | 0.369         | 0.84       | 1.07       | 0.81                        | ***           | 0.76       | 0.88       |
|                    | 2014           | 1.07          | 0.250         | 0.95       | 1.21       | 0.91                        | 0.011*        | 0.85       | 0.98       |
|                    | 2017           | 1.24          | <0.001<br>*** | 1.11       | 1.39       | 1.08                        | 0.033*        | 1.01       | 1.15       |
| <b>Sex</b>         | Males          | (Ref)         | -             | -          | -          | (Ref)                       | -             | -          | -          |
|                    | Females        | 1.56          | <0.001<br>*** | 1.45       | 1.67       | 1.54                        | <0.001<br>*** | 1.47       | 1.60       |
| <b>Age (years)</b> | 18 - 24        | (Ref)         | -             | -          | -          | (Ref)                       | -             | -          | -          |
|                    | 25 - 34        | 0.86          | 0.032*        | 0.75       | 0.99       | 0.77                        | <0.001<br>*** | 0.72       | 0.83       |
|                    | 35 - 44        | 0.97          | 0.646         | 0.85       | 1.11       | 0.79                        | <0.001<br>*** | 0.73       | 0.85       |
|                    | 45 - 54        | 1.33          | <0.001<br>*** | 1.17       | 1.52       | 0.86                        | <0.001<br>*** | 0.80       | 0.93       |
|                    | 55 - 64        | 1.10          | 0.168         | 0.96       | 1.26       | 0.79                        | <0.001<br>*** | 0.73       | 0.85       |
| <b>Location</b>    | Major cities   | (Ref)         | -             | -          | -          | +++++                       | -             | -          | -          |
|                    | Inner regional | 1.16          | 0.001*<br>*   | 1.06       | 1.26       | 1.11                        | <0.001<br>*** | 1.05       | 1.17       |
|                    | Other          | 1.03          | 0.505         | 0.94       | 1.14       | 1.06                        | 0.069         | 1.00       | 1.12       |

Supplementary Table 2: Prevalence of psychological distress by sex and age-groups over time.

|                                 | K10 very-high |       |       |        | K10 combined high/very-high |        |        |
|---------------------------------|---------------|-------|-------|--------|-----------------------------|--------|--------|
|                                 | n             | Rate  | 95%   | CI     | Rate                        | 95%    | CI     |
| <i>Males aged 18-24 years</i>   |               |       |       |        |                             |        |        |
| 2001                            | 759           | 2.64% | 1.50% | 3.77%  | 11.07%                      | 8.84%  | 13.30% |
| 2004                            | 622           | 2.25% | 1.09% | 3.42%  | 11.25%                      | 8.77%  | 13.74% |
| 2007                            | 684           | 1.02% | 0.27% | 1.78%  | 7.31%                       | 5.36%  | 9.26%  |
| 2011                            | 626           | 2.72% | 1.44% | 3.99%  | 10.86%                      | 8.43%  | 13.30% |
| 2014                            | 560           | 3.93% | 2.32% | 5.54%  | 11.61%                      | 8.95%  | 14.26% |
| 2017                            | 562           | 3.91% | 2.31% | 5.52%  | 15.30%                      | 12.33% | 18.28% |
| <i>Males aged 25-34 years</i>   |               |       |       |        |                             |        |        |
| 2001                            | 1555          | 2.12% | 1.41% | 2.84%  | 10.61%                      | 9.08%  | 12.14% |
| 2004                            | 1569          | 2.55% | 1.77% | 3.33%  | 9.82%                       | 8.34%  | 11.29% |
| 2007                            | 1224          | 2.29% | 1.45% | 3.13%  | 10.54%                      | 8.82%  | 12.26% |
| 2011                            | 1231          | 2.11% | 1.31% | 2.92%  | 9.10%                       | 7.49%  | 10.70% |
| 2014                            | 1106          | 2.98% | 1.98% | 3.99%  | 9.40%                       | 7.68%  | 11.12% |
| 2017                            | 1205          | 3.98% | 2.88% | 5.09%  | 11.45%                      | 9.65%  | 13.25% |
| <i>Males aged 35-44 years</i>   |               |       |       |        |                             |        |        |
| 2001                            | 1888          | 2.81% | 2.06% | 3.55%  | 10.43%                      | 9.06%  | 11.81% |
| 2004                            | 1865          | 3.65% | 2.80% | 4.50%  | 12.06%                      | 10.59% | 13.54% |
| 2007                            | 1553          | 2.96% | 2.12% | 3.81%  | 9.98%                       | 8.49%  | 11.47% |
| 2011                            | 1427          | 3.15% | 2.25% | 4.06%  | 9.46%                       | 7.94%  | 10.98% |
| 2014                            | 1253          | 3.19% | 2.22% | 4.17%  | 10.69%                      | 8.98%  | 12.41% |
| 2017                            | 1307          | 3.21% | 2.26% | 4.17%  | 10.64%                      | 8.96%  | 12.31% |
| <i>Males aged 45-54 years</i>   |               |       |       |        |                             |        |        |
| 2001                            | 1544          | 4.02% | 3.04% | 4.99%  | 11.53%                      | 9.94%  | 13.12% |
| 2004                            | 1670          | 3.95% | 3.02% | 4.89%  | 12.16%                      | 10.59% | 13.72% |
| 2007                            | 1395          | 4.16% | 3.11% | 5.21%  | 11.47%                      | 9.80%  | 13.14% |
| 2011                            | 1353          | 3.55% | 2.56% | 4.53%  | 9.16%                       | 7.63%  | 10.70% |
| 2014                            | 1164          | 3.95% | 2.83% | 5.07%  | 10.91%                      | 9.12%  | 12.70% |
| 2017                            | 1330          | 5.11% | 3.93% | 6.30%  | 13.08%                      | 11.27% | 14.90% |
| <i>Males aged 55-64 years</i>   |               |       |       |        |                             |        |        |
| 2001                            | 1051          | 3.62% | 2.49% | 4.74%  | 10.75%                      | 8.88%  | 12.62% |
| 2004                            | 1409          | 3.83% | 2.83% | 4.83%  | 11.36%                      | 9.70%  | 13.01% |
| 2007                            | 1239          | 3.63% | 2.59% | 4.67%  | 11.70%                      | 9.91%  | 13.49% |
| 2011                            | 1234          | 4.13% | 3.02% | 5.24%  | 9.56%                       | 7.92%  | 11.20% |
| 2014                            | 1114          | 3.23% | 2.19% | 4.27%  | 9.16%                       | 7.46%  | 10.85% |
| 2017                            | 1310          | 5.04% | 3.85% | 6.22%  | 13.89%                      | 12.02% | 15.77% |
| <i>Females aged 18-24 years</i> |               |       |       |        |                             |        |        |
| 2001                            | 869           | 5.64% | 4.11% | 7.17%  | 23.02%                      | 20.22% | 25.81% |
| 2004                            | 708           | 3.25% | 1.94% | 4.55%  | 19.63%                      | 16.71% | 22.56% |
| 2007                            | 679           | 4.71% | 3.12% | 6.31%  | 18.41%                      | 15.49% | 21.32% |
| 2011                            | 600           | 4.00% | 2.43% | 5.57%  | 15.50%                      | 12.60% | 18.40% |
| 2014                            | 565           | 6.90% | 4.81% | 8.99%  | 21.42%                      | 18.03% | 24.80% |
| 2017                            | 612           | 8.01% | 5.86% | 10.16% | 22.06%                      | 18.77% | 25.34% |
| <i>Females aged 25-34 years</i> |               |       |       |        |                             |        |        |
| 2001                            | 1924          | 5.35% | 4.35% | 6.36%  | 17.15%                      | 15.47% | 18.84% |
| 2004                            | 1802          | 4.50% | 3.54% | 5.45%  | 16.04%                      | 14.34% | 17.73% |
| 2007                            | 1442          | 3.88% | 2.89% | 4.88%  | 14.36%                      | 12.55% | 16.16% |
| 2011                            | 1483          | 3.51% | 2.57% | 4.44%  | 13.01%                      | 11.30% | 14.73% |
| 2014                            | 1380          | 3.91% | 2.89% | 4.94%  | 13.12%                      | 11.33% | 14.90% |

|                                 |      |       |       |       |        |        |        |
|---------------------------------|------|-------|-------|-------|--------|--------|--------|
| 2017                            | 1371 | 4.30% | 3.23% | 5.38% | 15.17% | 13.27% | 17.07% |
| <i>Females aged 35-44 years</i> |      |       |       |       |        |        |        |
| 2001                            | 2172 | 4.65% | 3.76% | 5.54% | 16.44% | 14.88% | 18.00% |
| 2004                            | 2148 | 5.49% | 4.53% | 6.46% | 17.32% | 15.72% | 18.92% |
| 2007                            | 1666 | 4.44% | 3.45% | 5.43% | 14.83% | 13.12% | 16.53% |
| 2011                            | 1548 | 4.07% | 3.09% | 5.05% | 12.73% | 11.07% | 14.39% |
| 2014                            | 1510 | 4.57% | 3.52% | 5.62% | 13.64% | 11.91% | 15.37% |
| 2017                            | 1537 | 4.49% | 3.45% | 5.52% | 14.12% | 12.38% | 15.86% |
| <i>Females aged 45-54 years</i> |      |       |       |       |        |        |        |
| 2001                            | 1664 | 6.43% | 5.25% | 7.61% | 16.53% | 14.74% | 18.31% |
| 2004                            | 1839 | 6.58% | 5.45% | 7.71% | 16.53% | 14.83% | 18.23% |
| 2007                            | 1451 | 5.58% | 4.40% | 6.76% | 15.78% | 13.91% | 17.66% |
| 2011                            | 1507 | 7.03% | 5.74% | 8.32% | 14.86% | 13.07% | 16.66% |
| 2014                            | 1355 | 6.64% | 5.32% | 7.97% | 16.75% | 14.76% | 18.74% |
| 2017                            | 1470 | 6.94% | 5.64% | 8.24% | 17.48% | 15.54% | 19.42% |
| <i>Females aged 55-64 years</i> |      |       |       |       |        |        |        |
| 2001                            | 1215 | 3.54% | 2.50% | 4.58% | 12.35% | 10.50% | 14.20% |
| 2004                            | 1536 | 4.56% | 3.51% | 5.60% | 14.26% | 12.51% | 16.01% |
| 2007                            | 1271 | 4.41% | 3.28% | 5.53% | 14.00% | 12.10% | 15.91% |
| 2011                            | 1323 | 4.31% | 3.21% | 5.40% | 13.00% | 11.19% | 14.81% |
| 2014                            | 1289 | 6.05% | 4.75% | 7.35% | 14.58% | 12.66% | 16.51% |
| 2017                            | 1479 | 7.17% | 5.85% | 8.48% | 18.73% | 16.74% | 20.72% |

Supplementary Table 3: Prevalence of psychological distress by household income over time. Income quintile 1 are lowest incomes, and quintile 5 are highest.

|      |   | K10 very-high |          |       | K10 combined high/very-high |          |        |        |
|------|---|---------------|----------|-------|-----------------------------|----------|--------|--------|
| Year | n | Mean          | [95% CI] |       | Mean                        | [95% CI] |        |        |
| 2001 | 1 | 2064          | 10.88%   | 9.25% | 12.51%                      | 24.56%   | 22.36% | 26.76% |
|      | 2 | 1845          | 6.06%    | 4.78% | 7.35%                       | 20.11%   | 17.95% | 22.26% |
|      | 3 | 2201          | 1.98%    | 1.41% | 2.56%                       | 11.82%   | 10.27% | 13.37% |
|      | 4 | 2576          | 2.14%    | 1.47% | 2.81%                       | 9.12%    | 7.82%  | 10.43% |
|      | 5 | 3077          | 1.01%    | 0.58% | 1.45%                       | 5.76%    | 4.82%  | 6.70%  |
| 2004 | 1 | 2286          | 11.47%   | 9.90% | 13.05%                      | 28.36%   | 26.07% | 30.65% |
|      | 2 | 2071          | 5.39%    | 4.19% | 6.58%                       | 16.99%   | 15.00% | 18.99% |
|      | 3 | 2547          | 3.33%    | 2.45% | 4.20%                       | 12.87%   | 11.23% | 14.50% |
|      | 4 | 2909          | 1.82%    | 1.24% | 2.39%                       | 10.09%   | 8.75%  | 11.43% |
|      | 5 | 3257          | 1.07%    | 0.64% | 1.50%                       | 5.69%    | 4.73%  | 6.66%  |
| 2007 | 1 | 1518          | 10.12%   | 8.26% | 11.97%                      | 26.02%   | 23.11% | 28.94% |
|      | 2 | 1824          | 5.13%    | 3.86% | 6.39%                       | 16.69%   | 14.50% | 18.88% |
|      | 3 | 2340          | 3.22%    | 2.04% | 4.40%                       | 11.18%   | 9.39%  | 12.97% |
|      | 4 | 2656          | 2.23%    | 1.43% | 3.03%                       | 9.68%    | 8.19%  | 11.17% |
|      | 5 | 2823          | 1.13%    | 0.58% | 1.68%                       | 6.53%    | 5.31%  | 7.75%  |
| 2011 | 1 | 1286          | 10.80%   | 8.69% | 12.92%                      | 25.81%   | 22.70% | 28.92% |
|      | 2 | 1477          | 6.74%    | 5.18% | 8.30%                       | 17.44%   | 15.06% | 19.82% |
|      | 3 | 2175          | 3.07%    | 2.22% | 3.92%                       | 10.03%   | 8.48%  | 11.59% |
|      | 4 | 2595          | 1.68%    | 0.99% | 2.37%                       | 7.07%    | 5.77%  | 8.36%  |
|      | 5 | 2730          | 1.43%    | 0.83% | 2.04%                       | 5.59%    | 4.48%  | 6.70%  |
| 2014 | 1 | 1342          | 11.77%   | 9.67% | 13.86%                      | 25.85%   | 22.76% | 28.95% |
|      | 2 | 1297          | 6.52%    | 4.77% | 8.26%                       | 19.37%   | 16.59% | 22.15% |
|      | 3 | 1880          | 3.02%    | 2.04% | 4.00%                       | 12.30%   | 10.37% | 14.22% |
|      | 4 | 2289          | 1.99%    | 1.21% | 2.78%                       | 9.13%    | 7.53%  | 10.73% |
|      | 5 | 2346          | 1.73%    | 0.90% | 2.57%                       | 5.65%    | 4.39%  | 6.92%  |
| 2017 | 1 | 1539          | 10.72%   | 8.99% | 12.45%                      | 26.42%   | 23.68% | 29.15% |
|      | 2 | 1541          | 6.66%    | 5.12% | 8.20%                       | 18.97%   | 16.50% | 21.44% |
|      | 3 | 2164          | 3.61%    | 2.61% | 4.61%                       | 13.00%   | 11.20% | 14.80% |
|      | 4 | 2576          | 1.89%    | 1.23% | 2.55%                       | 9.19%    | 7.80%  | 10.58% |
|      | 5 | 2664          | 2.11%    | 1.30% | 2.91%                       | 7.98%    | 6.61%  | 9.36%  |

Supplementary Table 4: Prevalence of psychological distress by household income quintile and time. Income quintile 1 are lowest incomes, and quintile 5 are highest.

|                                            | K10 very-high |        |        |        | K10 combined high/very-high |        |        |
|--------------------------------------------|---------------|--------|--------|--------|-----------------------------|--------|--------|
|                                            | n             | Rate   | 95%    | CI     | Rate                        | 95%    | CI     |
| <i>Males income quintile 1 (poorest)</i>   |               |        |        |        |                             |        |        |
| 2001                                       | 820           | 9.64%  | 7.13%  | 12.16% | 21.71%                      | 18.34% | 25.08% |
| 2004                                       | 877           | 11.51% | 8.88%  | 14.14% | 30.14%                      | 26.34% | 33.94% |
| 2007                                       | 669           | 8.93%  | 6.21%  | 11.65% | 24.90%                      | 20.48% | 29.32% |
| 2011                                       | 605           | 10.52% | 7.43%  | 13.60% | 26.17%                      | 21.61% | 30.73% |
| 2014                                       | 530           | 9.33%  | 6.31%  | 12.35% | 22.67%                      | 17.99% | 27.36% |
| 2017                                       | 619           | 9.98%  | 7.43%  | 12.53% | 24.64%                      | 20.35% | 28.93% |
| <i>Males income quintile 2</i>             |               |        |        |        |                             |        |        |
| 2001                                       | 689           | 5.12%  | 3.21%  | 7.03%  | 15.99%                      | 12.86% | 19.11% |
| 2004                                       | 836           | 5.66%  | 3.70%  | 7.62%  | 14.16%                      | 11.29% | 17.02% |
| 2007                                       | 779           | 4.68%  | 2.65%  | 6.71%  | 14.53%                      | 11.39% | 17.66% |
| 2011                                       | 610           | 5.56%  | 3.39%  | 7.74%  | 14.32%                      | 10.98% | 17.66% |
| 2014                                       | 498           | 5.20%  | 2.66%  | 7.75%  | 17.06%                      | 12.76% | 21.36% |
| 2017                                       | 638           | 4.68%  | 2.97%  | 6.39%  | 13.41%                      | 10.50% | 16.32% |
| <i>Males income quintile 3</i>             |               |        |        |        |                             |        |        |
| 2001                                       | 1054          | 1.45%  | 0.77%  | 2.13%  | 8.70%                       | 6.82%  | 10.58% |
| 2004                                       | 1201          | 2.67%  | 1.65%  | 3.70%  | 10.75%                      | 8.58%  | 12.93% |
| 2007                                       | 1106          | 1.82%  | 0.78%  | 2.85%  | 8.06%                       | 6.00%  | 10.12% |
| 2011                                       | 1001          | 2.39%  | 1.21%  | 3.56%  | 8.08%                       | 6.03%  | 10.12% |
| 2014                                       | 864           | 2.19%  | 1.01%  | 3.37%  | 10.03%                      | 7.49%  | 12.57% |
| 2017                                       | 1003          | 3.18%  | 1.85%  | 4.50%  | 11.98%                      | 9.49%  | 14.47% |
| <i>Males income quintile 4</i>             |               |        |        |        |                             |        |        |
| 2001                                       | 1234          | 1.54%  | 0.75%  | 2.33%  | 6.88%                       | 5.29%  | 8.47%  |
| 2004                                       | 1511          | 0.96%  | 0.37%  | 1.55%  | 7.14%                       | 5.55%  | 8.74%  |
| 2007                                       | 1324          | 1.92%  | 0.79%  | 3.06%  | 7.61%                       | 5.72%  | 9.50%  |
| 2011                                       | 1276          | 0.95%  | 0.32%  | 1.57%  | 5.27%                       | 3.75%  | 6.80%  |
| 2014                                       | 1143          | 1.63%  | 0.70%  | 2.57%  | 7.62%                       | 5.49%  | 9.75%  |
| 2017                                       | 1273          | 1.82%  | 0.98%  | 2.67%  | 9.08%                       | 7.17%  | 11.00% |
| <i>Males income quintile 5 (richest)</i>   |               |        |        |        |                             |        |        |
| 2001                                       | 1703          | 0.43%  | 0.01%  | 0.85%  | 4.16%                       | 3.09%  | 5.24%  |
| 2004                                       | 1785          | 0.60%  | 0.24%  | 0.96%  | 4.02%                       | 2.96%  | 5.08%  |
| 2007                                       | 1564          | 0.91%  | 0.30%  | 1.52%  | 5.38%                       | 3.90%  | 6.86%  |
| 2011                                       | 1476          | 0.94%  | 0.33%  | 1.54%  | 4.25%                       | 2.95%  | 5.56%  |
| 2014                                       | 1222          | 1.48%  | 0.24%  | 2.73%  | 4.22%                       | 2.56%  | 5.87%  |
| 2017                                       | 1411          | 1.68%  | 0.61%  | 2.76%  | 6.28%                       | 4.49%  | 8.06%  |
| <i>Females income quintile 1 (poorest)</i> |               |        |        |        |                             |        |        |
| 2001                                       | 1244          | 11.91% | 9.78%  | 14.04% | 26.94%                      | 24.05% | 29.82% |
| 2004                                       | 1409          | 11.45% | 9.50%  | 13.39% | 27.10%                      | 24.26% | 29.93% |
| 2007                                       | 849           | 11.14% | 8.59%  | 13.68% | 26.99%                      | 23.11% | 30.88% |
| 2011                                       | 681           | 11.08% | 8.18%  | 13.98% | 25.46%                      | 21.23% | 29.69% |
| 2014                                       | 812           | 13.63% | 10.74% | 16.52% | 28.29%                      | 24.18% | 32.40% |
| 2017                                       | 920           | 11.30% | 8.95%  | 13.65% | 27.82%                      | 24.29% | 31.35% |
| <i>Females income quintile 2</i>           |               |        |        |        |                             |        |        |
| 2001                                       | 1156          | 6.80%  | 5.07%  | 8.53%  | 23.31%                      | 20.37% | 26.24% |
| 2004                                       | 1235          | 5.15%  | 3.71%  | 6.59%  | 19.43%                      | 16.68% | 22.18% |
| 2007                                       | 1045          | 5.50%  | 3.91%  | 7.09%  | 18.49%                      | 15.45% | 21.53% |
| 2011                                       | 867           | 7.74%  | 5.54%  | 9.95%  | 20.09%                      | 16.74% | 23.43% |

|                                            |      |       |       |        |        |        |        |
|--------------------------------------------|------|-------|-------|--------|--------|--------|--------|
| 2014                                       | 799  | 7.60% | 5.21% | 9.98%  | 21.27% | 17.65% | 24.90% |
| 2017                                       | 903  | 8.21% | 5.84% | 10.58% | 23.32% | 19.65% | 27.00% |
| <i>Females income quintile 3</i>           |      |       |       |        |        |        |        |
| 2001                                       | 1147 | 2.53% | 1.59% | 3.46%  | 14.99% | 12.55% | 17.43% |
| 2004                                       | 1346 | 3.95% | 2.55% | 5.35%  | 14.88% | 12.47% | 17.29% |
| 2007                                       | 1234 | 4.47% | 2.46% | 6.49%  | 13.98% | 11.16% | 16.80% |
| 2011                                       | 1174 | 3.68% | 2.46% | 4.89%  | 11.77% | 9.47%  | 14.08% |
| 2014                                       | 1016 | 3.86% | 2.30% | 5.41%  | 14.59% | 11.71% | 17.47% |
| 2017                                       | 1161 | 4.03% | 2.53% | 5.53%  | 13.99% | 11.40% | 16.58% |
| <i>Females income quintile 4</i>           |      |       |       |        |        |        |        |
| 2001                                       | 1342 | 2.75% | 1.66% | 3.84%  | 11.44% | 9.38%  | 13.49% |
| 2004                                       | 1398 | 2.82% | 1.78% | 3.86%  | 13.53% | 11.31% | 15.75% |
| 2007                                       | 1332 | 2.55% | 1.41% | 3.69%  | 11.86% | 9.55%  | 14.17% |
| 2011                                       | 1319 | 2.43% | 1.20% | 3.66%  | 8.90%  | 6.81%  | 10.99% |
| 2014                                       | 1146 | 2.37% | 1.10% | 3.65%  | 10.73% | 8.33%  | 13.13% |
| 2017                                       | 1303 | 1.97% | 0.95% | 2.99%  | 9.31%  | 7.29%  | 11.32% |
| <i>Females income quintile 5 (richest)</i> |      |       |       |        |        |        |        |
| 2001                                       | 1374 | 1.75% | 0.92% | 2.58%  | 7.79%  | 6.16%  | 9.42%  |
| 2004                                       | 1472 | 1.67% | 0.81% | 2.52%  | 7.83%  | 6.13%  | 9.54%  |
| 2007                                       | 1259 | 1.42% | 0.43% | 2.40%  | 8.02%  | 6.00%  | 10.05% |
| 2011                                       | 1254 | 2.08% | 0.92% | 3.23%  | 7.31%  | 5.43%  | 9.19%  |
| 2014                                       | 1124 | 2.03% | 0.97% | 3.09%  | 7.36%  | 5.40%  | 9.32%  |
| 2017                                       | 1253 | 2.62% | 1.41% | 3.84%  | 10.07% | 7.93%  | 12.20% |
